# Supplementary material for: The Effect of Sadness on Visual Artistic Creativity in Non-Artists
Source: MDPI journal article supplement (doi:10.3390/brainsci13010149), 2023-01-15
Supplement: s1 [file s1]

## **Supplementary materials**

10 pieces of music per condition self-selected by participants (singer-title)

### *Positive condition – Happy music*

1. ABBA – Gimme! Gimme! Gimme! (A man after midnight)
2. Simple Minds – See the lights
3. Bob Sinclair and Raffaella Carrà – A far l'amor comincia tu
4. Depeche Mode – Personal Jesus
5. Simone Cristicchi – Vorrei cantare come Biagio
6. Michael Jackson – Billy Jean
7. Bruno Mars – The Lazy song
8. Grace Jones – I have seen that face before
9. Michael Sembello – Maniac
10. LMFAO – Sexy and I know it

### *Negative condition – Sad music*

1. James Blunt – Goodbye my lover
2. Ennio Morricone – Strana bambina
3. Depeche Mode – Waiting for the night
4. Lucio Battisti - Emozioni
5. Fabrizio De André – La canzone dell'amore perduto
6. Yiruma – River flows in you
7. Yumeji's Theme – In the mood for love
8. Bruce Springsteen - Philadelphia
9. Yann Tiersen – Good bye Lenin
10. Distrubed – The sound of silence

### *Neutral condition*

1. Jovanotti – A te
2. Ligabue – Una vita da mediano
3. Annalisa – Dieci
4. Fedez ft Francesca Michelino – Magnifico
5. George Michael – Careless Whisper
6. Gustave Holst – The planets
7. Cesare Cremonini – Marmellata #25
8. Tatanai – Quelli come noi
9. Lemandorle – Ti amo il venerdì sera
10. Le Donatella – Scarpe Diem
